# Supplementary material for: A novel enzyme with antioxidant capacity produced by the ubiquitous skin colonizer Propionibacterium acnes
Source: PubMed Central journal article supplement (PMC5090349; doi:10.1038/srep36412), 2016-11-02
Supplement: srep36412-s1.pdf [file srep36412-s1.pdf]

1 A novel enzyme with antioxidant capacity produced by the  
2 ubiquitous skin colonizer *Propionibacterium acnes*

3

4 Maria Allhorn<sup>1</sup>, Sabine Arve<sup>1</sup>, Holger Brüggemann<sup>2</sup>, Rolf Lood<sup>1\*</sup>

5

6

7

8 **Supplementary Information**

9

10

11

12

13

14

15

16

17

18

19

20

21

22

23

24

25

26

27

28

29

30

31

32

33

34

35

36

37

38

39

40

41

42



70  
71  
72

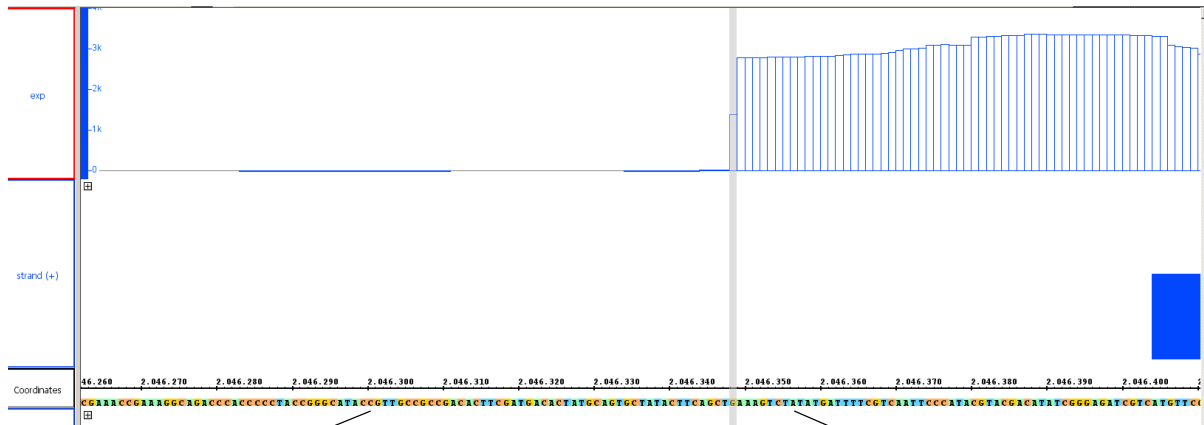

CGTTGCCGCCGACAC **-35** TTCGAT GACACTATGCAGTGC **-10** TATACT TCAGCT **G** AAAGTCT

73  
74  
75  
76  
77  
78  
79  
80  
81  
82  
83  
84  
85  
86  
87  
88  
89  
90  
91  
92  
93  
94  
95  
96  
97  
98  
99  
100  
101  
102

**Supplementary Fig. 2A. Upstream region of *roxP*: Identification of the transcriptional start site and the promoter region.** The transcriptional start site is highlighted ('G') as well as the predicted promoter region.

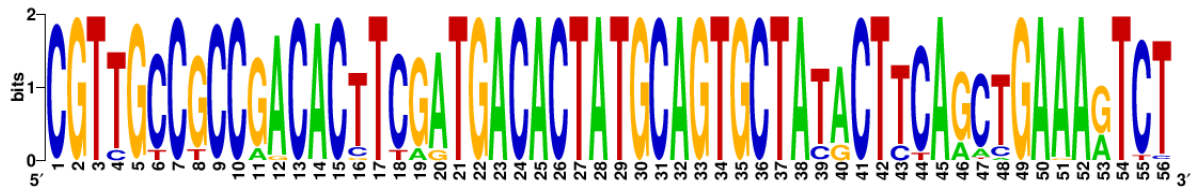

103  
 104  
 105  
 106  
 107  
 108  
 109  
 110  
 111  
 112  
 113  
 114  
 115  
 116  
 117  
 118  
 119  
 120  
 121  
 122  
 123  
 124  
 125  
 126  
 127  
 128  
 129  
 130  
 131  
 132  
 133  
 134  
 135  
 136  
 137  
 138  
 139  
 140  
 141  
 142  
 143  
 144  
 145

**Supplementary Fig. 2B. Consensus sequence of the *roxP* upstream region based on an alignment of sequences from 94 strains.** The alignment was created with MEGA, and the consensus sequence was visualized with WebLogo.

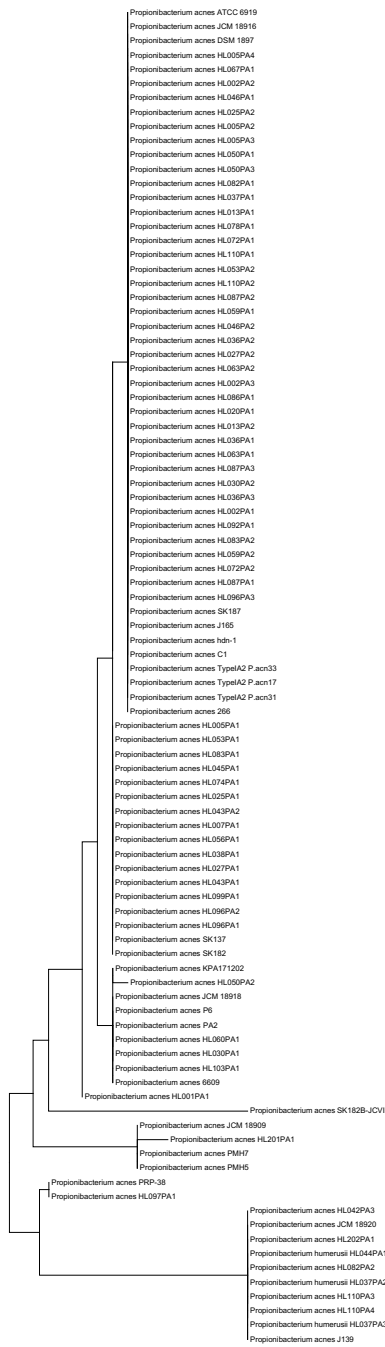

146  
147  
148  
149  
150  
151  
152  
153  
154  
155  
156

**Supplementary Fig. 2C. Phylogenetic analysis of *roxP* upstream region.** The *roxP* upstream region, containing the transcriptional start site and the predicted promoter (shown in Fig 2SA), was taken and blasted against all *P. acnes* genomes. The corresponding homologous sequences were extracted and phylogenetically analyzed with MEGA6.

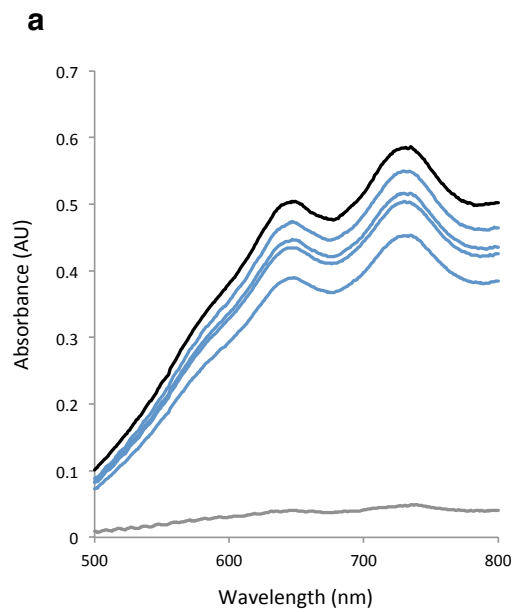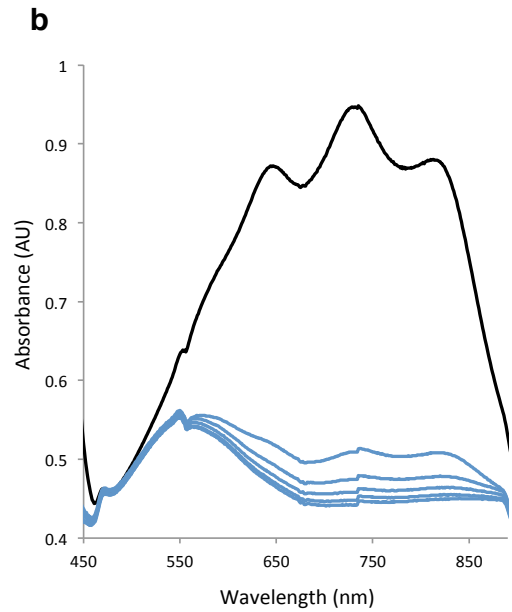

157  
158  
159  
160  
161  
162  
163  
164  
165  
166  
167  
168  
169  
170  
171  
172  
173  
174  
175  
176  
177  
178  
179  
180  
181  
182  
183  
184

**Supplementary Fig. 3. Vitamin E and RoxP reduce preformed ABTS-radicals.** (A) Vitamin E (black line: control; gray line: 15  $\mu$ M vitamin E; blue lines: 1.5  $\mu$ M vitamin E over 0-5 min) was incubated with preformed ABTS-radicals and changes in absorbance was measured over time (0-5 min). (B) RoxP (black line: control; blue lines: 34  $\mu$ M RoxP over 10-60 min) was incubated with preformed ABTS-radicals and changes in absorbance was measured over time (10-60 min).

185

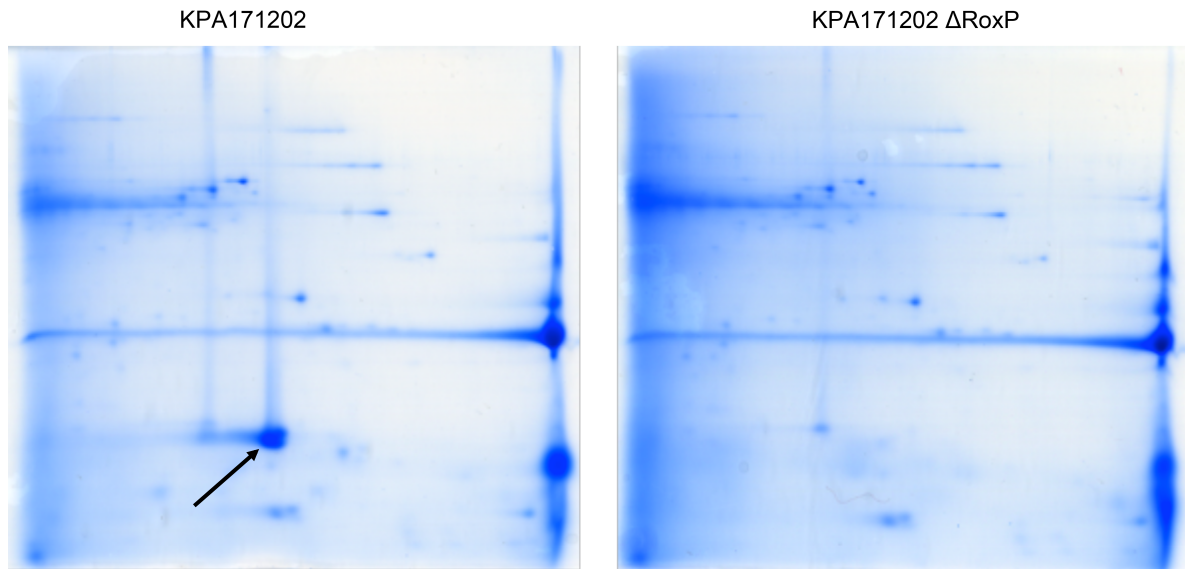

186

187

188 **Supplementary Fig. 4. Confirmation of successful deletion of *roxP* by 2D gel**  
189 **electrophoresis of secreted proteins of *P. acnes*.** RoxP was previously identified among the  
190 abundantly secreted proteins. 2D protein gel electrophoresis of secreted proteins of the  
191 wildtype and  $\Delta$ *roxP*-mutant strains clearly showed that RoxP (arrow) is absent among the  
192 secreted proteins of the  $\Delta$ *roxP*-mutant. This confirms that the *roxP* gene was successfully  
193 knocked out.

194

195

196

197

198
